# Supplementary material for: Regular use of fish oil supplements and course of cardiovascular diseases: prospective cohort study
Source: PubMed Central journal article supplement (PMC11116879; doi:10.1136/bmjmed-2022-000451), 2024-05-21
Supplement: bmjmed-2022-000451supp002.pdf [file bmjmed-2022-000451supp002.pdf]

**Habitual fish oil supplementation and dynamic trajectory of cardiovascular diseases: A multi-state analysis in a nationwide cohort study**

**Figure S1. Numbers of participants in transition pattern II from baseline to atrial fibrillation, heart failure (HF), and death.**

Note: The cases of progression from AF to stroke/MI to death have been included in the AF to death pathway. AF: atrial fibrillation; HF: heart failure; MI: myocardial infarction.

**Figure S2. Numbers of participants in transition pattern III from baseline to atrial fibrillation, stroke, and death.**

Note: The cases of progression from AF to HF/MI to death have been included in the AF to death pathway. AF: atrial fibrillation; HF: heart failure; MI: myocardial infarction.

**Figure S3. Numbers of participants in transition pattern IV from baseline to atrial fibrillation, myocardial infarction (MI), and death.**

Note: The cases of progression from AF to HF/stroke to death have been included in the AF to death pathway. AF: atrial fibrillation; HF: heart failure; MI: myocardial infarction.

**Table S1. Baseline characteristics of the study participants stratified by fish oil supplementation.**

Note: Data were presented as mean (SD) or n (%); COPD: chronic obstructive pulmonary disease; CRF: chronic renal failure; HDL: high-density lipoprotein; LDL: low-density lipoprotein; TC: total cholesterol; TG: triglyceride.

\* These variables included missing values.

**Table S2. Characteristics of the participants excluded and included in the study.**

Note: Data were presented as mean (SD) or n (%); BMI: body mass index; COPD: chronic obstructive pulmonary disease; CRF: chronic renal failure.

**Figure S4. Subgroup analysis of associations of fish supplementation with cardiovascular disease transition (transition A-B).**

Note: AF: atrial fibrillation; HF: heart failure; MI: myocardial infarction; MACE: major adverse cardiovascular events. Multivariable models were adjusted for age, sex, race, Townsend deprivation index, oily fish consumption, nonoily fish consumption, smoking status, alcohol consumption, obesity, hypertension, diabetes mellitus, chronic obstructive pulmonary disease, chronic renal failure, antilipemic drug use, and antidiabetic drug use, as appropriate.

**Figure S5. Subgroup analysis of associations of fish supplementation with cardiovascular disease transition (transition C-D).**

Note: AF: atrial fibrillation; HF: heart failure; MI: myocardial infarction; MACE: major adverse cardiovascular events. Multivariable models were adjusted for age, sex, race, Townsend deprivation index, oily fish consumption, nonoily fish consumption, smoking status, alcohol consumption, obesity, hypertension, diabetes mellitus, chronic obstructive pulmonary disease, chronic renal failure, antilipemic drug use, and antidiabetic drug use, as appropriate.

**Figure S5. Subgroup analysis of associations of fish supplementation with cardiovascular disease transition (transition E-F).**

Note: AF: atrial fibrillation; HF: heart failure; MI: myocardial infarction; MACE: major adverse cardiovascular events. Multivariable models were adjusted for age, sex, race, Townsend deprivation index, oily fish consumption, nonoily fish consumption, smoking status, alcohol consumption, obesity, hypertension, diabetes mellitus, chronic obstructive pulmonary disease, chronic renal failure, antilipemic drug use, and

antidiabetic drug use, as appropriate.

**Table S3. Sensitivity analysis of associations of fish oil supplementation with transitions of cardiovascular diseases.**

Note: HR: hazard ratio; CI: confidence interval; AF: atrial fibrillation; HF: heart failure; MI: myocardial infarction; MACE: major adverse cardiovascular events.

Multivariable models were adjusted for age, sex, race, Townsend deprivation index, oily fish consumption, nonoily fish consumption, smoking status, alcohol consumption, obesity, hypertension, diabetes mellitus, chronic obstructive pulmonary disease, chronic renal failure, antilipemic drug use, and antidiabetic drug use. as appropriate.

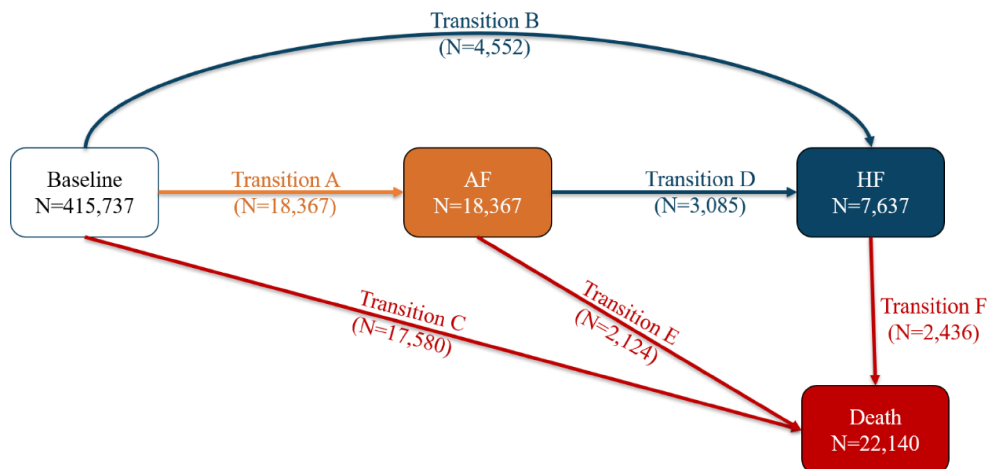

**Figure S1. Numbers of participants in transition pattern II from baseline to atrial fibrillation, heart failure (HF), and death.**

Note: The cases of progression from AF to stroke/MI to death have been included in the AF to death pathway. AF: atrial fibrillation; HF: heart failure; MI: myocardial infarction.

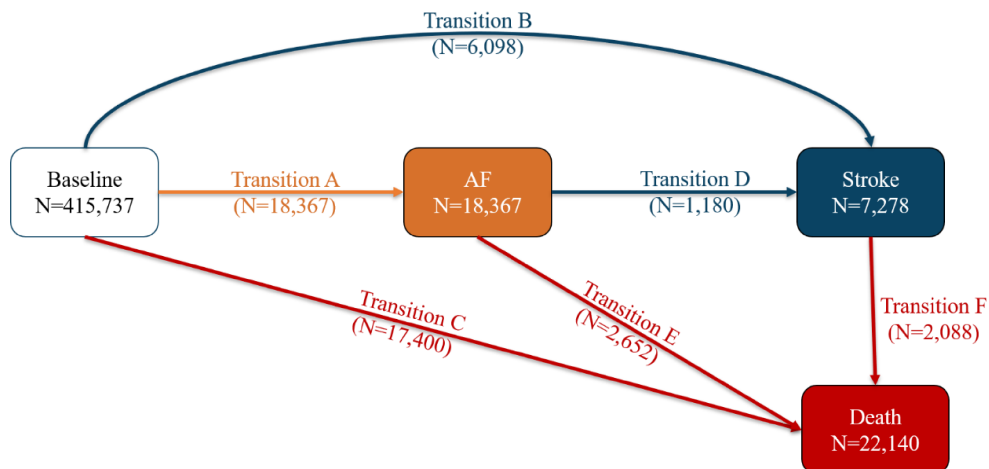

**Figure S2. Numbers of participants in transition pattern III from baseline to atrial fibrillation, stroke, and death.**

Note: The cases of progression from AF to HF/MI to death have been included in the AF to death pathway. AF: atrial fibrillation; HF: heart failure; MI: myocardial infarction.

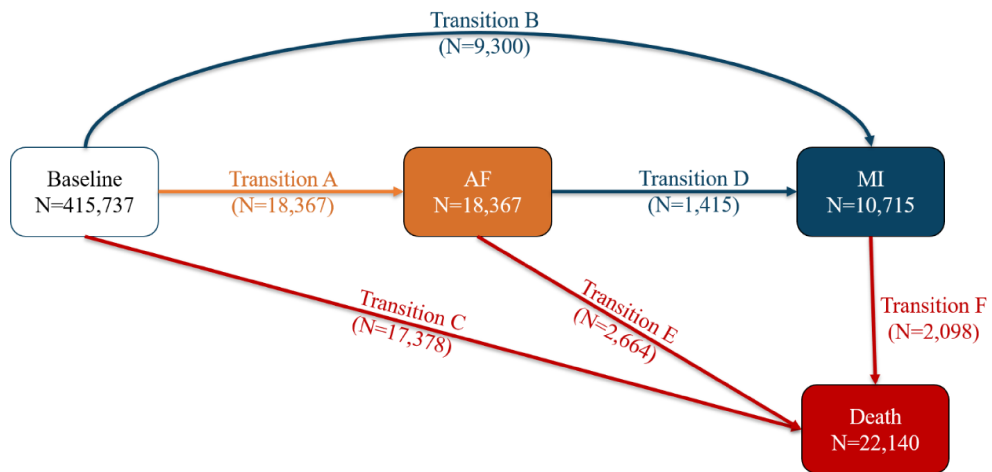

**Figure S3. Numbers of participants in transition pattern IV from baseline to atrial fibrillation, myocardial infarction (MI), and death.**

Note: The cases of progression from AF to HF/stroke to death have been included in the AF to death pathway. AF: atrial fibrillation; HF: heart failure; MI: myocardial infarction.

**Table S1. Baseline characteristics of the study participants stratified by fish oil supplementation.**

| Characteristics                      | Overall<br>(N=415,737) | Fish oil<br>non-users<br>(N=285,372) | Fish oil<br>users<br>(N=130,365) |
|--------------------------------------|------------------------|--------------------------------------|----------------------------------|
| <b>History of obesity (%)</b>        |                        |                                      |                                  |
| No                                   | 405566 (97.6)          | 278098 (97.5)                        | 127468 (97.8)                    |
| Yes                                  | 10171 (2.4)            | 7274 (2.5)                           | 2897 (2.2)                       |
| <b>History of diabetes (%)</b>       |                        |                                      |                                  |
| No                                   | 393792 (94.7)          | 269761 (94.5)                        | 124031 (95.1)                    |
| Yes                                  | 21945 (5.3)            | 15611 (5.5)                          | 6334 (4.9)                       |
| <b>History of hypertension (%)</b>   |                        |                                      |                                  |
| No                                   | 132971 (32.0)          | 95129 (33.3)                         | 37842 (29.0)                     |
| Yes                                  | 282766 (68.0)          | 190243 (66.7)                        | 92523 (71.0)                     |
| <b>History of COPD (%)</b>           |                        |                                      |                                  |
| No                                   | 412710 (99.3)          | 283180 (99.2)                        | 129530 (99.4)                    |
| Yes                                  | 3027 (0.7)             | 2192 (0.8)                           | 835 (0.6)                        |
| <b>History of CRF (%)</b>            |                        |                                      |                                  |
| No                                   | 411762 (99.0)          | 282687 (99.1)                        | 129075 (99.0)                    |
| Yes                                  | 3975 (1.0)             | 2685 (0.9)                           | 1290 (1.0)                       |
| <b>Statin use (%)</b>                |                        |                                      |                                  |
| No                                   | 360277 (86.7)          | 249290 (87.4)                        | 110987 (85.1)                    |
| Yes                                  | 55460 (13.3)           | 36082 (12.6)                         | 19378 (14.9)                     |
| <b>Antidiabetic drug use (%)</b>     |                        |                                      |                                  |
| No                                   | 402278 (96.8)          | 275638 (96.6)                        | 126640 (97.1)                    |
| Yes                                  | 13459 (3.2)            | 9734 (3.4)                           | 3725 (2.9)                       |
| <b>Antihypertensive drug use (%)</b> |                        |                                      |                                  |
| No                                   | 336183 (80.9)          | 232927 (81.6)                        | 103256 (79.2)                    |
| Yes                                  | 79554 (19.1)           | 52445 (18.4)                         | 27109 (20.8)                     |
| <b>TC* (mmol/L, mean±SD)</b>         | 5.7 ± 1.1              | 5.7 ± 1.1                            | 5.8 ± 1.1                        |
| <b>TG* (mmol/L, mean±SD)</b>         | 1.7 ± 1.0              | 1.7 ± 1.0                            | 1.7 ± 1.0                        |
| <b>HDL* (mmol/L, mean±SD)</b>        | 1.5 ± 0.4              | 1.4 ± 0.4                            | 1.5 ± 0.4                        |
| <b>LDL* (mmol/L, mean±SD)</b>        | 3.6 ± 0.9              | 3.6 ± 0.9                            | 3.6 ± 0.9                        |
| <b>HbA1c* (mmol/mol, mean±SD)</b>    | 35.9 ± 6.4             | 35.8 ± 6.7                           | 35.9 ± 5.9                       |

Note: Data were presented as mean (SD) or n (%); COPD: chronic obstructive pulmonary disease; CRF: chronic renal failure; HDL: high-density lipoprotein; LDL: low-density lipoprotein; TC: total cholesterol; TG: triglyceride.

\* These variables included missing values.

Table S2. Characteristics of the participants excluded and included in the study.

| Characteristics                                  | Exclude<br>(N=86,724) | Include<br>(N=415,737) | P      |
|--------------------------------------------------|-----------------------|------------------------|--------|
| <b>Age (years, %)</b>                            |                       |                        | <0.001 |
| <65                                              | 59933 (69.1)          | 346524 (83.4)          |        |
| ≥65                                              | 26791 (30.9)          | 69213 (16.6)           |        |
| <b>Sex (%)</b>                                   |                       |                        | <0.001 |
| Female                                           | 44595 (51.4)          | 228758 (55.0)          |        |
| Male                                             | 42128 (48.6)          | 186979 (45.0)          |        |
| <b>Race (%)</b>                                  |                       |                        | <0.001 |
| White                                            | 79861 (95.1)          | 392851 (94.5)          |        |
| Non-white                                        | 4146 (4.9)            | 22886 (5.5)            |        |
| <b>Setting* (%)</b>                              |                       |                        | <0.001 |
| Rural                                            | 11169 (13.0)          | 57474 (14.0)           |        |
| Urban                                            | 74563 (87.0)          | 354186 (86.0)          |        |
| <b>BMI* (%)</b>                                  |                       |                        | <0.001 |
| Underweight                                      | 477 (0.6)             | 2149 (0.5)             |        |
| Normal                                           | 24588 (28.7)          | 137806 (33.3)          |        |
| Overweight                                       | 36057 (42.1)          | 176041 (42.5)          |        |
| Obese                                            | 24464 (28.6)          | 97774 (23.6)           |        |
| <b>Oily fish consumption (times/week, %)</b>     |                       |                        | <0.001 |
| <2                                               | 65088 (78.8)          | 343096 (82.5)          |        |
| ≥2                                               | 17556 (21.2)          | 72641 (17.5)           |        |
| <b>Non-oily fish consumption (times/week, %)</b> |                       |                        | <0.001 |
| <2                                               | 68432 (82.4)          | 348253 (83.8)          |        |
| ≥2                                               | 14569 (17.6)          | 67484 (16.2)           |        |
| <b>Vegetable consumption* (times/week, %)</b>    |                       |                        | <0.001 |
| <2                                               | 6928 (8.1)            | 28365 (6.8)            |        |
| 2-                                               | 23090 (27.0)          | 119066 (28.7)          |        |
| ≥4                                               | 55402 (64.9)          | 267926 (64.5)          |        |
| <b>Fruit consumption* (times/week, %)</b>        |                       |                        | <0.001 |
| <2                                               | 23763 (27.8)          | 115111 (27.7)          |        |
| 2-                                               | 34019 (39.8)          | 169869 (40.9)          |        |
| ≥4                                               | 27669 (32.4)          | 130467 (31.4)          |        |
| <b>Red meat consumption* (times/week, %)</b>     |                       |                        | 0.0119 |
| <2                                               | 12688 (14.9)          | 61945 (14.9)           |        |
| 2-                                               | 37388 (43.8)          | 183952 (44.3)          |        |
| ≥4                                               | 35308 (41.4)          | 169588 (40.8)          |        |
| <b>Smoking status (%)</b>                        |                       |                        | <0.001 |
| Never                                            | 40130 (47.9)          | 233367 (56.1)          |        |
| Ever                                             | 33876 (40.4)          | 139168 (33.5)          |        |
| Current                                          | 9769 (11.7)           | 43202 (10.4)           |        |
| <b>Alcohol consumption (%)</b>                   |                       |                        | <0.001 |
| Never                                            | 4473 (5.3)            | 17911 (4.3)            |        |
| Ever                                             | 4263 (5.0)            | 13836 (3.3)            |        |
| Current                                          | 76335 (89.7)          | 383990 (92.4)          |        |
| <b>Physical activity* (%)</b>                    |                       |                        | <0.001 |
| Low                                              | 13314 (21.0)          | 62892 (18.6)           |        |
| Moderate                                         | 25809 (40.7)          | 138203 (40.8)          |        |
| High                                             | 24253 (38.3)          | 137878 (40.7)          |        |
| <b>Townsend deprive index (mean±SD)</b>          | -1.0±3.2              | -1.4±3.1               | <0.001 |
| <b>History of obesity (%)</b>                    |                       |                        | <0.001 |
| No                                               | 83344 (96.1)          | 405566 (97.6)          |        |
| Yes                                              | 3380 (3.9)            | 10171 (2.4)            |        |
| <b>History of diabetes (%)</b>                   |                       |                        | <0.001 |

|                                      |              |               |        |
|--------------------------------------|--------------|---------------|--------|
| No                                   | 77959 (89.9) | 393792 (94.7) |        |
| Yes                                  | 8764 (10.1)  | 21945 (5.3)   |        |
| <b>History of hypertension (%)</b>   |              |               | <0.001 |
| No                                   | 19936 (23.0) | 132971 (32.0) |        |
| Yes                                  | 66787 (77.0) | 282766 (68.0) |        |
| <b>History of COPD (%)</b>           |              |               | <0.001 |
| No                                   | 84870 (97.9) | 412710 (99.3) |        |
| Yes                                  | 1854 (2.1)   | 3027 (0.7)    |        |
| <b>History of CRF (%)</b>            |              |               | <0.001 |
| No                                   | 84649 (97.6) | 411762 (99.0) |        |
| Yes                                  | 2075 (2.4)   | 3975 (1.0)    |        |
| <b>Statin use (%)</b>                |              |               | <0.001 |
| No                                   | 59606 (68.7) | 360277 (86.7) |        |
| Yes                                  | 27118 (31.3) | 55460 (13.3)  |        |
| <b>Antidiabetic use (%)</b>          |              |               | <0.001 |
| No                                   | 81175 (93.6) | 402278 (96.8) |        |
| Yes                                  | 5549 (6.4)   | 13459 (3.2)   |        |
| <b>Antihypertensive drug use (%)</b> |              |               | <0.001 |
| No                                   | 52445 (60.5) | 336183 (80.9) |        |
| Yes                                  | 34278 (39.5) | 79554 (19.1)  |        |
| <b>TC (mmol/L, (mean±SD))</b>        | 5.5±1.2      | 5.7±1.1       | <0.001 |
| <b>TG (mmol/L, (mean±SD))</b>        | 1.8±1.0      | 1.7±1.0       | <0.001 |
| <b>HDL (mmol/L, (mean±SD))</b>       | 1.4±0.4      | 1.5±0.4       | <0.001 |
| <b>LDL (mmol/L, (mean±SD))</b>       | 3.4±0.9      | 3.6±0.9       | <0.001 |
| <b>HbA1c (mmol/mol, (mean±SD))</b>   | 37.6±8.1     | 35.9±6.4      | <0.001 |

Note: Data were presented as mean (SD) or n (%); BMI: body mass index; COPD: chronic obstructive pulmonary disease; CRF: chronic renal failure; HDL: high-density lipoprotein; LDL: low-density lipoprotein; TC: total cholesterol; TG: triglyceride.



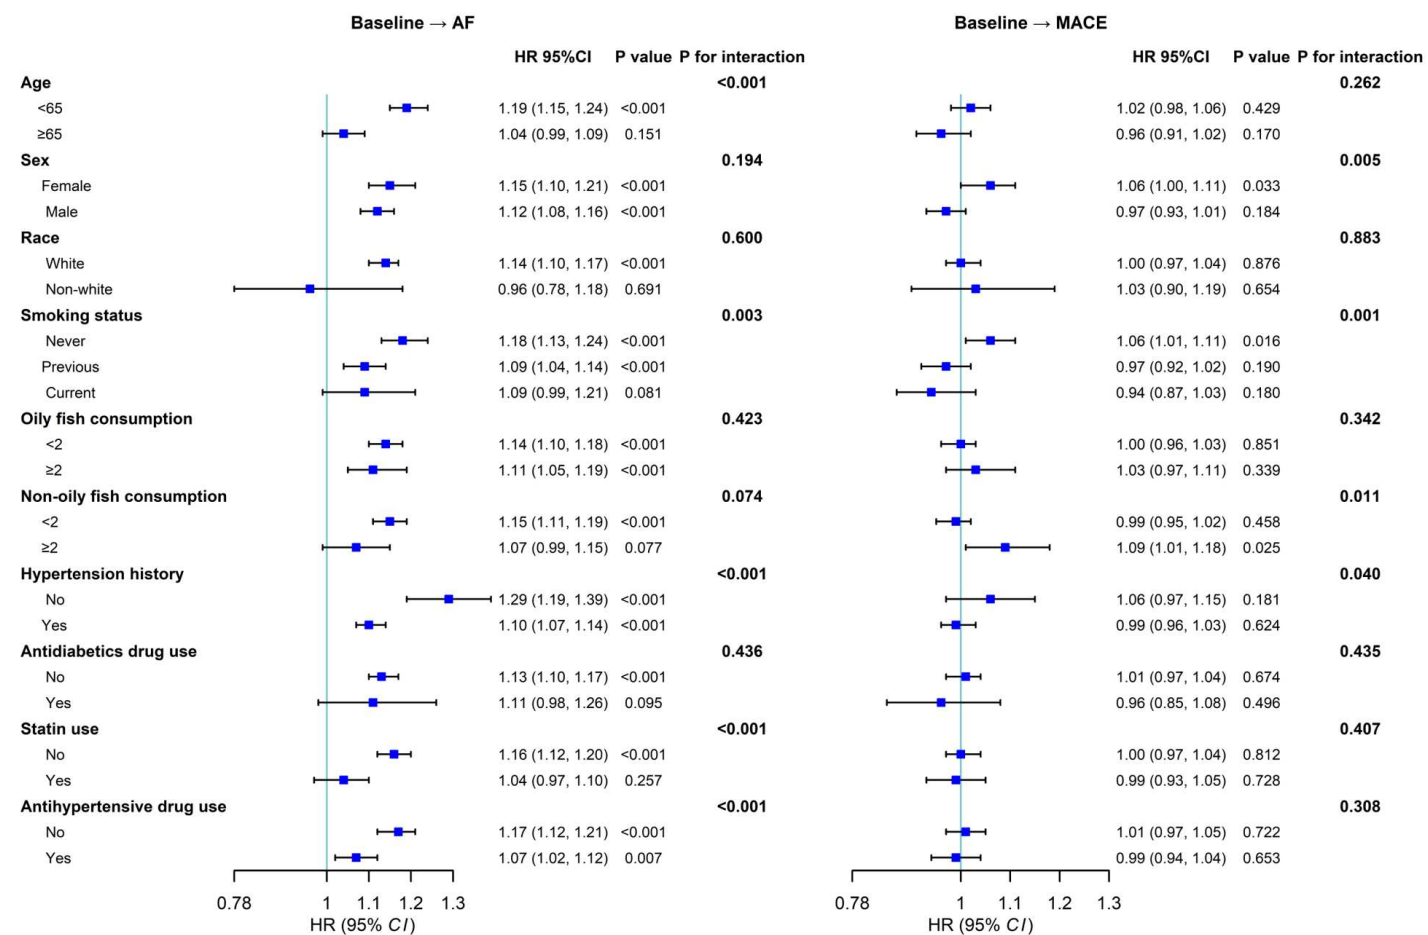

Figure S4. Subgroup analysis of associations of fish supplementation with cardiovascular disease transition (transition A-B).

Note: AF: atrial fibrillation; HF: heart failure; MI: myocardial infarction; MACE: major adverse cardiovascular events. Multivariable models were adjusted for age, sex, race, Townsend deprivation index, oily fish consumption, nonoily fish consumption, smoking status, alcohol consumption, obesity, hypertension, diabetes mellitus, chronic obstructive pulmonary disease, chronic renal failure, statin use, antidiabetic drug use and antihypertensive drug use as appropriate.

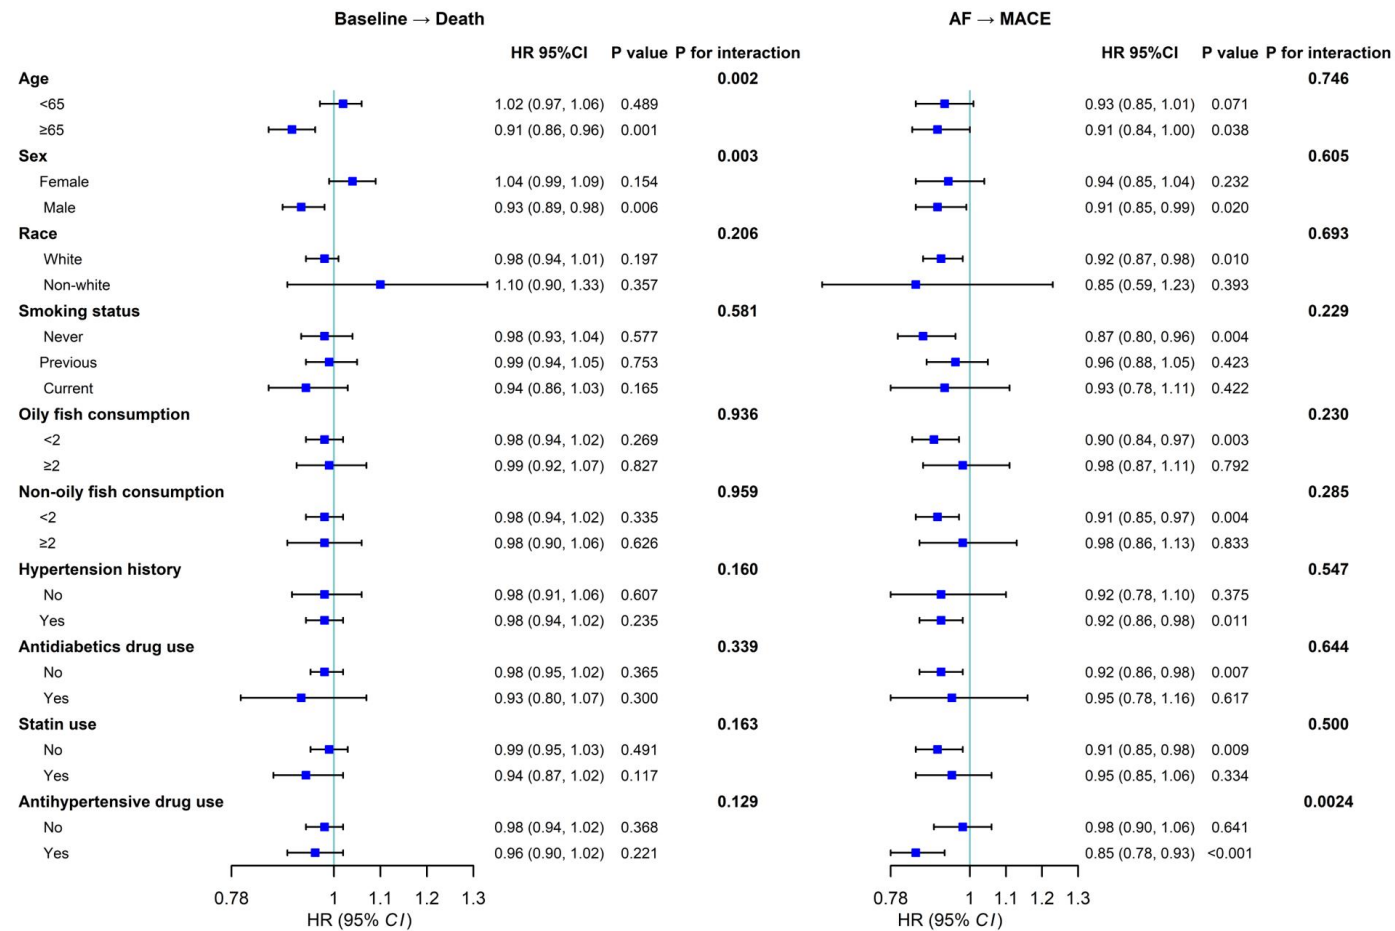

Figure S5. Subgroup analysis of associations of fish supplementation with cardiovascular disease transition (transition C-D).

Note: AF: atrial fibrillation; HF: heart failure; MI: myocardial infarction; MACE: major adverse cardiovascular events. Multivariable models were adjusted for age, sex, race, Townsend deprivation index, oily fish consumption, nonoily fish consumption, smoking status, alcohol consumption, obesity, hypertension, diabetes mellitus, chronic obstructive pulmonary disease, chronic renal failure, statin use, antidiabetic drug use and antihypertensive drug use as appropriate.

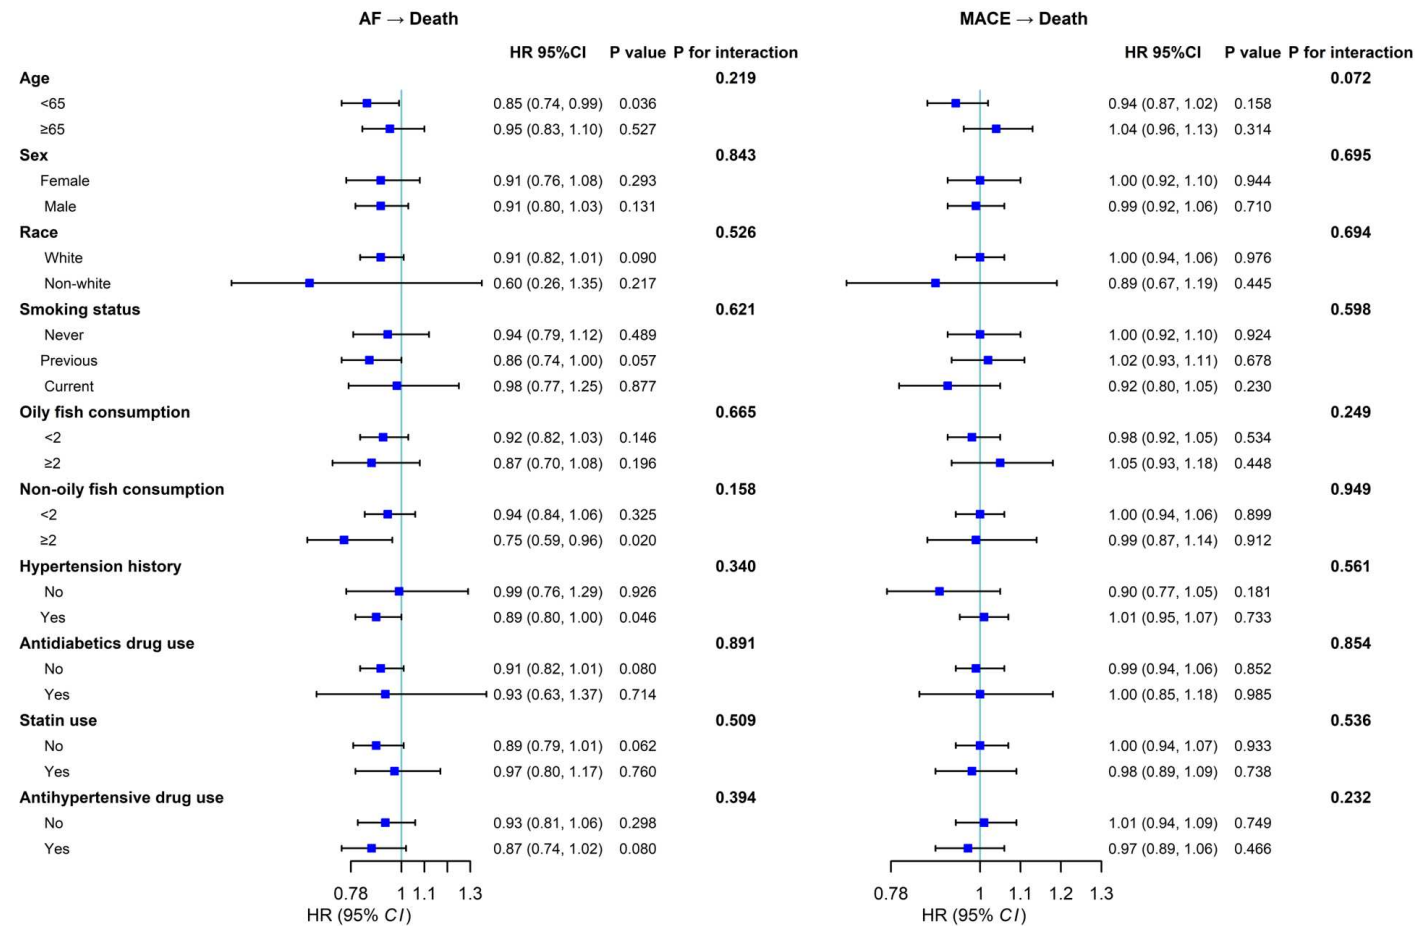

Figure S6. Subgroup analysis of associations of fish supplementation with cardiovascular disease transition (transition E-F).

Note: AF: atrial fibrillation; HF: heart failure; MI: myocardial infarction; MACE: major adverse cardiovascular events. Multivariable models were adjusted for age, sex, race, Townsend deprivation index, oily fish consumption, nonoily fish consumption, smoking status, alcohol consumption, obesity, hypertension, diabetes mellitus, chronic obstructive pulmonary disease, chronic renal failure, statin use, antidiabetic drug use and antihypertensive drug use as appropriate.

**Table S3. Sensitivity analysis of associations of fish oil supplementation with transitions of cardiovascular diseases.**

|                                                                          | HR (95% CI)         |                   |                   |                     |                     |                   |
|--------------------------------------------------------------------------|---------------------|-------------------|-------------------|---------------------|---------------------|-------------------|
|                                                                          | Baseline → AF       | Baseline → MACE   | Baseline → Death  | AF → MACE           | AF → Death          | MACE → Death      |
| Additional adjustment for setting, body mass index and physical activity | 1.17 (1.13, 1.21)*  | 1.03 (0.99, 1.07) | 0.99 (0.96, 1.04) | 0.94 (0.88, 1.00)   | 0.90 (0.80, 1.01)   | 0.97 (0.91, 1.04) |
| Adjustment for binge drink instead of alcohol consumption                | 1.13 (1.10, 1.17) * | 1.01 (0.97, 1.04) | 0.98 (0.95, 1.02) | 0.93 (0.87, 0.99) * | 0.89 (0.80, 0.99) * | 0.98 (0.92, 1.04) |
| Additional adjustment for vegetable, fruit, and red meat consumption     | 1.13 (1.10, 1.16) * | 1.02 (0.98, 1.05) | 0.99 (0.96, 1.03) | 0.94 (0.88, 0.99) * | 0.93 (0.84, 1.03)   | 1.00 (0.95, 1.07) |
| Different interval                                                       |                     |                   |                   |                     |                     |                   |
| 0.5 years                                                                | 1.13 (1.10, 1.17) * | 1.00 (0.97, 1.04) | 0.98 (0.95, 1.02) | 0.92 (0.87, 0.98) * | 0.91 (0.82, 1.01)   | 0.99 (0.94, 1.06) |
| 1 year                                                                   | 1.13 (1.10, 1.17) * | 1.00 (0.97, 1.04) | 0.98 (0.95, 1.02) | 0.92 (0.87, 0.98) * | 0.91 (0.82, 1.01)   | 0.99 (0.94, 1.06) |
| 2 years                                                                  | 1.13 (1.10, 1.17) * | 1.00 (0.97, 1.04) | 0.98 (0.95, 1.02) | 0.93 (0.87, 0.98) * | 0.91 (0.82, 1.01)   | 0.99 (0.94, 1.06) |
| Excluding participants who entered different states on the same date     | 1.14 (1.10, 1.18) * | 1.01 (0.97, 1.04) | 0.98 (0.95, 1.02) | 0.91 (0.84, 0.98) * | 0.91 (0.82, 1.01)   | 0.98 (0.92, 1.06) |
| Excluding events occurred in the first two-year of follow-up             | 1.14 (1.10, 1.17) * | 1.01 (0.97, 1.04) | 0.98 (0.95, 1.02) | 0.91 (0.84, 0.98) * | 0.91 (0.82, 1.01)   | 0.99 (0.92, 1.06) |
| Restricting the follow-up date to March 2020                             | 1.13 (1.10, 1.17) * | 1.00 (0.96, 1.03) | 0.99 (0.95, 1.03) | 0.93 (0.87, 0.99) * | 0.88 (0.78, 0.98) * | 1.02 (0.95, 1.08) |
| Inverse probability weighted method                                      |                     |                   |                   |                     |                     |                   |
| The average treatment effect                                             | 1.13 (1.10, 1.17) * | 1.00 (0.97, 1.03) | 0.98 (0.95, 1.02) | 0.89 (0.83, 0.95) * | 0.87 (0.78, 0.97) * | 0.95 (0.89, 1.02) |
| The average treatment effect of the treated                              | 1.11 (1.08, 1.14) * | 1.00 (0.96, 1.03) | 0.97 (0.94, 1.01) | 0.89 (0.83, 0.96) * | 0.87 (0.78, 0.97) * | 0.97 (0.91, 1.03) |
| The average treatment effect on the controls                             | 1.14 (1.11, 1.18) * | 1.00 (0.97, 1.03) | 0.98 (0.95, 1.02) | 0.88 (0.82, 0.95) * | 0.87 (0.78, 0.97) * | 0.95 (0.89, 1.01) |

Note: HR: hazard ratio; CI: confidence interval; AF: atrial fibrillation; HF: heart failure; MI: myocardial infarction; MACE: major adverse cardiovascular events.

Multivariable models were adjusted for age, sex, race, Townsend deprivation index, oily fish consumption, nonoily fish consumption, smoking status, alcohol consumption, obesity, hypertension, diabetes mellitus, chronic obstructive pulmonary disease, chronic renal failure, statin use, antidiabetic drug use and antihypertensive drug use as appropriate.

\*  $P < 0.05$ .
